# Supplementary material
Source: PubMed Central journal article supplement (PMC5885161)
Supplement: jamaneurol-75-818-s001.pdf [file jamaneurol-75-818-s001.pdf]

## Supplementary Online Content

Tiruvoipati R, Pilcher D, Botha J, Buscher H, Simister R, Bailey M. Association of hypercapnia and hypercapnic acidosis with clinical outcomes in mechanically ventilated patients with cerebral injury. *JAMA Neurol*. Published online March 19, 2018. doi:10.1001/jamaneurol.2018.0123

**eFigure 1.** Kaplan-Meier Survival Curves All Cerebral Injury Patients

**eFigure 2.** Kaplan-Meier Survival Curves for Cardiac Arrest Patients

**eFigure 3.** Kaplan-Meier Survival Curves for Stroke Patients

**eFigure 4.** Kaplan-Meier Survival Curves for Traumatic Brain Injury Patients

**eTable 1.** Prediction Model to Determine Each Patient's Probability to Present to Intensive Care Units With Hypercapnic Acidosis

**eTable 2.** Prediction Model to Determine Each Patient's Probability to Present to Intensive Care Units With Compensated Hypercapnia

**eTable 3.** Adjusted Hospital Mortality for Cohort of Cerebral Injury Patients Matched for Admission Severity Scores

**eTable 4.** Adjusted Hospital Mortality\*\* (logistic regression) in Patients with Cerebral Injury Stratified Based on Glasgow Coma Scale (GCS)

**eTable 5.** Adjusted Hospital Mortality \*\* (logistic regression) in Subgroups of Cerebral Injury Based on Diagnostic Subgroups

**eTable 6.** Adjusted Hospital Mortality\*\* (logistic regression) in Subgroups of Cerebral Injury Patients Who Required Neurosurgical Intervention and Who Did Not Require Neurosurgical Intervention

This supplementary material has been provided by the authors to give readers additional information about their work.

eFigure 1 : Kaplan-Meier survival curves all cerebral injury patients

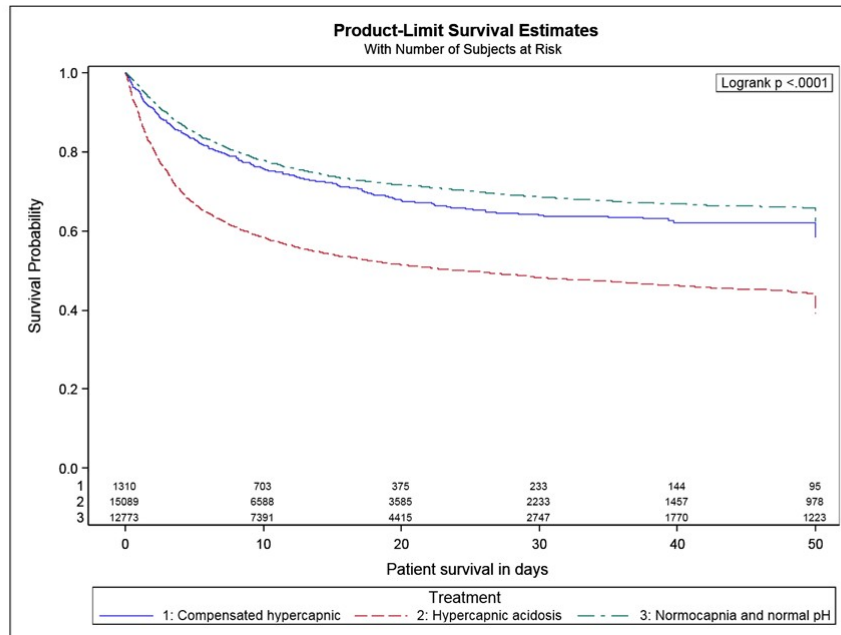

eFigure 2 Kaplan-Meier survival curves for cardiac arrest patients

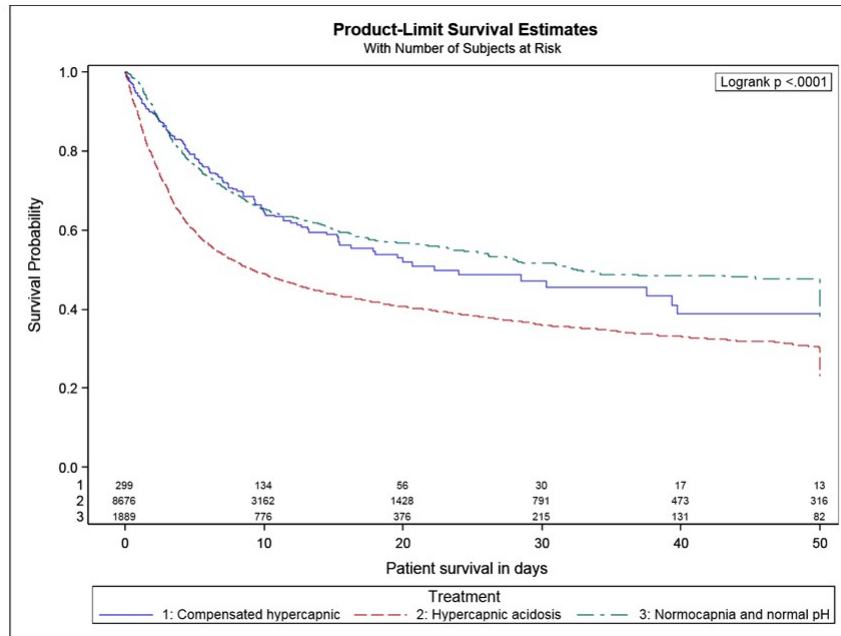

eFigure 3 Kaplan-Meier survival curves for stroke patients

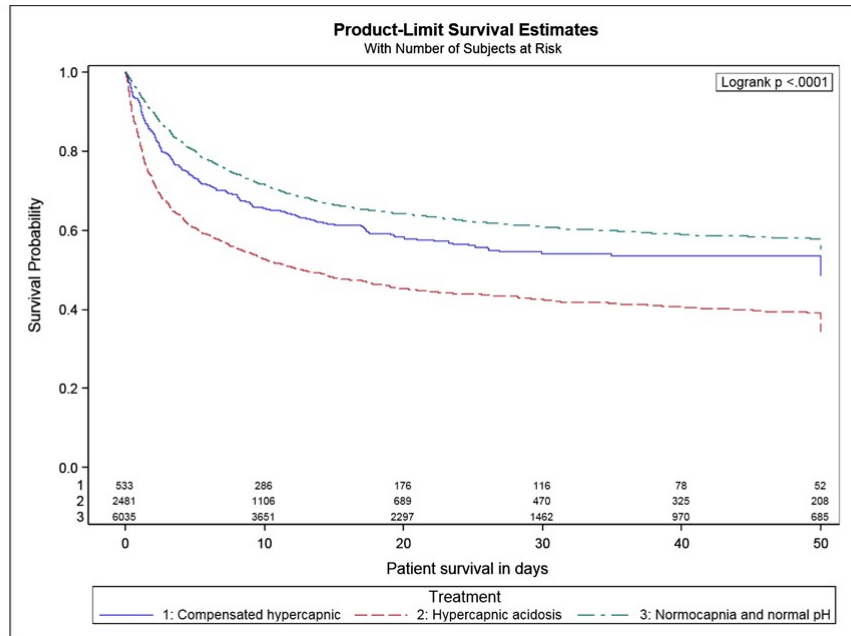

eFigure 4 Kaplan-Meier survival curves for traumatic brain injury patients

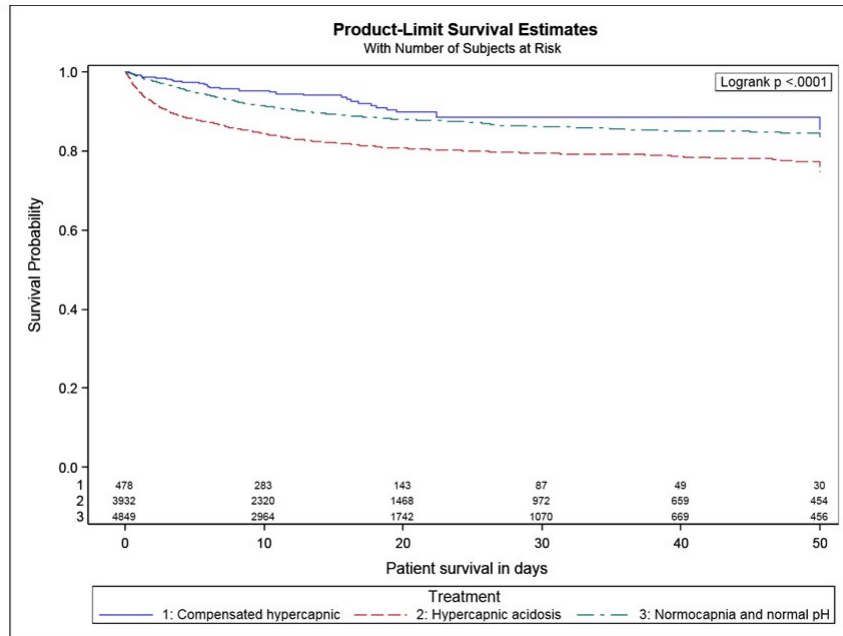

**e Table 1. Prediction model to determine each patient’s probability to present to intensive care units with Hypercapnic Acidosis**

| Category                     | Hypercapnic Acidosis |              | Odds Ratio      |
|------------------------------|----------------------|--------------|-----------------|
|                              | No                   | Yes          | 95%CI           |
| <b>Age</b>                   |                      |              |                 |
| 1.<=44                       | 33.9%(4879)          | 26.7%(4364)  | 1               |
| 2.45-64                      | 30.4%(4371)          | 33.5%(5470)  | 1.28(1.2-1.36)  |
| 3.65-84                      | 31.9%(4597)          | 35.8%(5860)  | 1.19(1.12-1.27) |
| 4.>=85                       | 3.8%(543)            | 4%(658)      | 1.08(0.95-1.23) |
| <b>Chronic renal failure</b> |                      |              |                 |
| No                           | 98.7%(14196)         | 97.1%(15880) | 1               |
| Yes                          | 1.3%(194)            | 2.9%(472)    | 1.78(1.49-2.13) |
| <b>Diabetes</b>              |                      |              |                 |
| No                           | 98.7%(14200)         | 97.5%(15949) | 1               |
| Yes                          | 1.3%(190)            | 2.5%(403)    | 1.43(1.19-1.72) |
| <b>Immunotherapy</b>         |                      |              |                 |
| No                           | 98.8%(14223)         | 98.1%(16040) | 1               |
| Yes                          | 1.2%(167)            | 1.9%(312)    | 1.58(1.3-1.93)  |
| <b>Gender</b>                |                      |              |                 |
| Female                       | 30.8%(4438)          | 27%(4418)    | 1               |
| Male                         | 69.2%(9952)          | 73%(11934)   | 1.29(1.22-1.36) |
| <b>Admission Source</b>      |                      |              |                 |
| Chronic care                 | 0.6%(84)             | 0.8%(137)    | 0.99(0.74-1.32) |
| Home                         | 52.9%(7611)          | 67.8%(11082) | 1               |
| Other Hospital               | 32%(4607)            | 22.6%(3695)  | 0.55(0.51-0.58) |
| Other ICU                    | 3.5%(508)            | 1.7%(284)    | 0.39(0.33-0.46) |
| Unknown                      | 11%(1580)            | 7.1%(1154)   | 0.86(0.75-0.99) |
| <b>Hospital Level</b>        |                      |              |                 |
| Metropolitan                 | 7.9%(1135)           | 17%(2782)    | 2.1(1.56-2.82)  |
| Private                      | 3%(435)              | 2.8%(462)    | 1               |
| Rural                        | 4.4%(630)            | 8.7%(1427)   | 1.89(1.4-2.55)  |
| Tertiary                     | 84.7%(12190)         | 71.4%(11681) | 1.01(0.77-1.33) |

\*All variables were significant p<0.0001

AUC= 0.683 (0.677-0.689)

Hosmer Lemmeshow p=0.11

**eTable 2. Prediction model to determine each patient's probability to present to intensive care units with compensated hypercapnia**

| Variable                                                | Compensated Hypercapnia |             | Odds Ratio<br>(95%CI) |
|---------------------------------------------------------|-------------------------|-------------|-----------------------|
|                                                         | No                      | Yes         |                       |
| <b>Diagnosis</b>                                        |                         |             |                       |
| Cardiovascular                                          | 38.9%(11450)            | 23%(308)    | 1                     |
| Neurological                                            | 30.4%(8929)             | 41%(548)    | 2.43(2.09-2.83)       |
| Trauma                                                  | 30.7%(9025)             | 36%(482)    | 2.15(1.84-2.51)       |
| <b>Day Shift admission</b>                              |                         |             |                       |
| No                                                      | 55.5%(16305)            | 53.1%(710)  | 0.86(0.77-0.96)       |
| Yes                                                     | 44.5%(13099)            | 46.9%(628)  | 1                     |
| <b>Admission Source</b>                                 |                         |             |                       |
| Chronic Care                                            | 0.7%(209)               | 0.9%(12)    | 1.53(0.85-2.77)       |
| Home                                                    | 61.1%(17968)            | 54.2%(725)  | 1                     |
| Other Hosp                                              | 26.7%(7863)             | 32.8%(439)  | 1.28(1.13-1.44)       |
| Other ICU                                               | 2.5%(735)               | 4.3%(57)    | 1.8(1.35-2.39)        |
| Unknown                                                 | 8.9%(2629)              | 7.8%(105)   | 0.85(0.68-1.07)       |
| <b>Hospital Type</b>                                    |                         |             |                       |
| Metropolitan                                            | 12.7%(3749)             | 12.6%(168)  | 1.25(0.87-1.8)        |
| Private                                                 | 2.9%(857)               | 3%(40)      | 1                     |
| Rural                                                   | 6.7%(1966)              | 6.8%(91)    | 1.19(0.81-1.75)       |
| Tertiary                                                | 77.6%(22832)            | 77.7%(1039) | 0.87(0.62-1.21)       |
| <b>Indigenous status</b>                                |                         |             |                       |
| No                                                      | 68.1%(20038)            | 66%(883)    | 1                     |
| Yes                                                     | 5.3%(1549)              | 3.7%(49)    | 0.76(0.56-1.02)       |
| Unknown                                                 | 26.6%(7817)             | 30.3%(406)  | 1.28(1.13-1.46)       |
| <b>Location<br/>(Australian states and New Zealand)</b> |                         |             |                       |
| ACT                                                     | 3.1%(916)               | 3.1%(42)    | 1.64(1.11-2.41)       |
| NSW                                                     | 25.6%(7530)             | 28.8%(385)  | 1.85(1.45-2.36)       |
| NT                                                      | 1.4%(399)               | 1%(13)      | 0.93(0.5-1.73)        |
| NZ                                                      | 9.9%(2913)              | 6.9%(92)    | 1                     |
| QLD                                                     | 15.5%(4570)             | 13.1%(175)  | 1.31(1-1.72)          |
| SA                                                      | 11%(3225)               | 13.2%(177)  | 2(1.53-2.6)           |
| TAS                                                     | 2.3%(676)               | 2.6%(35)    | 1.65(1.1-2.48)        |
| VIC                                                     | 25.6%(7513)             | 26.7%(357)  | 1.66(1.31-2.12)       |
| WA                                                      | 5.7%(1662)              | 4.6%(62)    | 1.41(0.99-2)          |
| <b>Gender</b>                                           |                         |             |                       |
| Female                                                  | 29%(8515)               | 25.5%(341)  | 1                     |
| Male                                                    | 71%(20889)              | 74.5%(997)  | 1.23(1.08-1.39)       |

\*All variables were significant  $p < 0.01$

AUC=0.632 (0.617-0.647)

Hosmer Lemmeshow  $p = 0.30$

**eTable 3: Adjusted hospital mortality for cohort of cerebral injury patients matched for admission severity scores**

| N                             | Diagnostic categories                                | Logistic regression analysis |         |
|-------------------------------|------------------------------------------------------|------------------------------|---------|
|                               |                                                      | OR (95% CI)                  | P Value |
| <b>Cardiac arrest</b>         |                                                      |                              |         |
|                               | Hypercapnic group                                    |                              | <0.0001 |
| 307                           | Normocapnia and normal pH                            | 1                            |         |
| 307                           | Compensated hypercapnia vs Normocapnia and normal pH | 0.97 (0.67-1.41)             |         |
| 307                           | Hypercapnic acidosis vs Normocapnia and normal pH    | 2.16 (1.48-3.15)             |         |
| <b>Stroke</b>                 |                                                      |                              |         |
|                               | Hypercapnic group                                    |                              | p=0.06  |
| 547                           | Normocapnia and normal pH                            | 1                            |         |
| 547                           | Compensated hypercapnia vs Normocapnia and normal pH | 1.05 (0.8-1.37)              |         |
| 547                           | Hypercapnic acidosis vs Normocapnia and normal pH    | 1.34 (1.03-1.74)             |         |
| <b>Traumatic Brain Injury</b> |                                                      |                              |         |
|                               | Hypercapnic group                                    |                              | p=0.13  |
| 481                           | Normocapnia and normal pH                            | 1                            |         |
| 481                           | Compensated hypercapnia vs Normocapnia and normal pH | 0.99 (0.6-1.64)              |         |
| 481                           | Hypercapnic acidosis vs Normocapnia and normal pH    | 1.48 (0.96-2.28)             |         |



eTable 4 Adjusted Hospital Mortality\*\* (logistic regression) in patients with cerebral injury stratified based on Glasgow Coma Scale (GCS)

| N                             | Baseline GCS                                         | Logistic regression analysis* |         |
|-------------------------------|------------------------------------------------------|-------------------------------|---------|
|                               |                                                      | OR (95% CI)                   | P-value |
| <b>Cardiac arrest</b>         |                                                      |                               |         |
|                               | <b>Hypercapnic group GCS3-7</b>                      |                               | <0.001  |
| 1260                          | Normocapnia and normal pH                            | 1                             |         |
| 192                           | Compensated vs Normocapnia and normal pH             | 1.11 (0.79-1.56)              |         |
| 7522                          | Hypercapnic acidosis vs Normocapnia and normal pH    | 1.53 (1.33-1.76)              |         |
|                               | <b>Hypercapnic group GCS8-12</b>                     |                               | 0.21    |
| 198                           | Normocapnia and normal pH                            | 1                             |         |
| 38                            | Compensated hypercapnia vs Normocapnia and normal pH | 0.7 (0.29-1.68)               |         |
| 562                           | Hypercapnic acidosis vs Normocapnia and normal pH    | 1.29 (0.85-1.94)              |         |
|                               | <b>Hypercapnic group GCS13-15</b>                    |                               | 0.04    |
| 430                           | Normocapnia and normal pH                            | 1                             |         |
| 71                            | Compensated hypercapnia vs Normocapnia and normal pH | 1.08 (0.51-2.29)              |         |
| 1180                          | Hypercapnic acidosis vs Normocapnia and normal pH    | 1.5 (1.08-2.1)                |         |
| <b>Stroke</b>                 |                                                      |                               |         |
|                               | <b>Hypercapnic group GCS3-7</b>                      |                               | <0.001  |
| 3098                          | Normocapnia and normal pH                            | 1                             |         |
| 280                           | Compensated hypercapnia vs Normocapnia and normal pH | 0.96 (0.73-1.27)              |         |
| 1737                          | Hypercapnic acidosis vs Normocapnia and normal pH    | 1.45 (1.25-1.67)              |         |
|                               | <b>Hypercapnic group GCS8-12</b>                     |                               | 0.03    |
| 1616                          | Normocapnia and normal pH                            | 1                             |         |
| 136                           | Compensated hypercapnia vs Normocapnia and normal pH | 1.25 (0.84-1.88)              |         |
| 461                           | Hypercapnic acidosis vs Normocapnia and normal pH    | 1.37 (1.07-1.76)              |         |
|                               | <b>Hypercapnic group GCS13-15</b>                    |                               | 0.11    |
| 1424                          | Normocapnia and normal pH                            | 1                             |         |
| 123                           | Compensated hypercapnia vs Normocapnia and normal pH | 0.81 (0.47-1.4)               |         |
| 469                           | Hypercapnic acidosis vs Normocapnia and normal pH    | 1.3 (0.98-1.74)               |         |
| <b>Traumatic Brain Injury</b> |                                                      |                               |         |
|                               | <b>Hypercapnic group GCS3-7</b>                      |                               | <0.001  |
| 2104                          | Normocapnia and normal pH                            | 1                             |         |
| 15                            | Compensated hypercapnia vs Normocapnia and normal pH | 0.61 (0.37-1.03)              |         |
| 1866                          | Hypercapnic acidosis vs Normocapnia and normal pH    | 1.39 (1.17-1.66)              |         |
|                               | <b>Hypercapnic group GCS8-12</b>                     |                               | 0.11    |
| 1356                          | Normocapnia and normal pH                            | 1                             |         |
| 116                           | Compensated hypercapnia vs Normocapnia and normal pH | 1.42 (0.61-3.29)              |         |
| 912                           | Hypercapnic acidosis vs Normocapnia and normal pH    | 0.72 (0.5-1.04)               |         |
|                               | <b>Hypercapnic group GCS13-15</b>                    |                               | 0.72    |
| 1383                          | Normocapnia and normal pH                            | 1                             |         |
| 204                           | Compensated hypercapnia vs Normocapnia and normal pH | 0.82 (0-939)                  |         |
| 1276                          | Hypercapnic acidosis vs Normocapnia and normal pH    | 1.2 (0.06-25.4)               |         |

\*p-value for interaction between neurological severity and hypercapnic group- Cardiac arrest: 0.88; Stroke:0.22; Traumatic brain injury: 0.03

\*\* all analyses are adjusted for GCS, patient severity (ANZROD with oxygen, pH and GCS components removed), propensity to present with hypercapnic acidosis, propensity to present with compensated hypercapnia and year of admission

eTable 5 **Adjusted Hospital Mortality \*\* (logistic regression) in subgroups of cerebral injury based on diagnostic subgroups**

| N                                                            | Diagnostic Subgroups                                 | Logistic regression analysis* |         |
|--------------------------------------------------------------|------------------------------------------------------|-------------------------------|---------|
|                                                              |                                                      | OR (95% CI)                   | P Value |
| <b>Ischaemic Stroke</b>                                      |                                                      |                               |         |
|                                                              | Hypercapnic group                                    |                               | 0.16    |
| 1233                                                         | Normocapnia and normal pH                            | 1                             |         |
| 151                                                          | Compensated hypercapnia vs Normocapnia and normal pH | 0.94 (0.64-1.37)              |         |
| 613                                                          | Hypercapnic acidosis vs Normocapnia and normal pH    | 1.23 (0.98-1.54)              |         |
| <b>Intracerebral haemorrhage</b>                             |                                                      |                               |         |
|                                                              | Hypercapnic group                                    |                               | 0.001   |
| 2402                                                         | Normocapnia and normal pH                            | 1                             |         |
| 228                                                          | Compensated hypercapnia vs Normocapnia and normal pH | 0.9 (0.65-1.25)               |         |
| 989                                                          | Hypercapnic acidosis vs Normocapnia and normal pH    | 1.42 (1.18-1.72)              |         |
| <b>Subarachnoid haemorrhage</b>                              |                                                      |                               |         |
|                                                              | Hypercapnic group                                    |                               | <0.001  |
| 1781                                                         | Normocapnia and normal pH                            | 1                             |         |
| 108                                                          | Compensated hypercapnia vs Normocapnia and normal pH | 1.13 (0.7-1.83)               |         |
| 875                                                          | Hypercapnic acidosis vs Normocapnia and normal pH    | 1.6 (1.3-1.98)                |         |
| <b>Subdural or extradural haemorrhage</b>                    |                                                      |                               |         |
|                                                              | Hypercapnic group                                    |                               | 0.29    |
| 803                                                          | Normocapnia and normal pH                            | 1                             |         |
| 61                                                           | Compensated hypercapnia vs Normocapnia and normal pH | 1.03 (0.52-2.03)              |         |
| 233                                                          | Hypercapnic acidosis vs Normocapnia and normal pH    | 1.36 (0.93-2)                 |         |
| <b>Isolated Traumatic Brain Injury</b>                       |                                                      |                               |         |
|                                                              | Hypercapnic group                                    |                               | 0.65    |
| 779                                                          | Normocapnia and normal pH                            | 1                             |         |
| 64                                                           | Compensated hypercapnia vs Normocapnia and normal pH | 0.71 (0-195.65)               |         |
| 500                                                          | Hypercapnic acidosis vs Normocapnia and normal pH    | 1.14 (0.11-12.45)             |         |
| <b>Traumatic Brain Injury associated with other injuries</b> |                                                      |                               |         |
|                                                              | Hypercapnic group                                    |                               | 0.002   |
| 4123                                                         | Normocapnia and normal pH                            | 1                             |         |
| 418                                                          | Compensated hypercapnia vs Normocapnia and normal pH | 0.74 (0.47-1.18)              |         |
| 3623                                                         | Hypercapnic acidosis vs Normocapnia and normal pH    | 1.28 (1.08-1.5)               |         |

\*p-value for interaction between diagnostic subgroup and hypercapnic group- Ischaemic stroke, intracerebral haemorrhage, subarachnoid haemorrhage and subdural or extradural haemorrhage:0.49; Isolated Traumatic brain injury and Traumatic brain injury associated with other injuries :0.81

\*\* all analyses are adjusted for GCS, patient severity (ANZROD with oxygen, pH and GCS components removed), propensity to present with hypercapnic acidosis, propensity to present with compensated hypercapnia and year of admission

eTable 6. **Adjusted Hospital Mortality\*\* (logistic regression) in subgroups of cerebral injury patients who required neurosurgical intervention and who did not require neurosurgical intervention**

| N                                            | Diagnostic Subgroups                                 | Logistic regression analysis* |         |
|----------------------------------------------|------------------------------------------------------|-------------------------------|---------|
|                                              |                                                      | OR (95% CI)                   | P Value |
| <b>Stroke- Nonoperative</b>                  |                                                      |                               |         |
|                                              | Hypercapnic group                                    |                               | <0.001  |
| 3612                                         | Normocapnia and normal pH                            | 1                             |         |
| 381                                          | Compensated hypercapnia vs Normocapnia and normal pH | 0.93 (0.73-1.19)              |         |
| 1953                                         | Hypercapnic acidosis vs Normocapnia and normal pH    | 1.44 (1.25-1.65)              |         |
| <b>Stroke- Operative</b>                     |                                                      |                               |         |
|                                              | Hypercapnic group                                    |                               | 0.02    |
| 2607                                         | Normocapnia and normal pH                            | 1                             |         |
| 167                                          | Compensated hypercapnia vs Normocapnia and normal pH | 1.12 (0.76-1.66)              |         |
| 757                                          | Hypercapnic acidosis vs Normocapnia and normal pH    | 1.32 (1.08-1.62)              |         |
| <b>Traumatic Brain Injury- Non operative</b> |                                                      |                               |         |
|                                              | Hypercapnic group                                    |                               | 0.02    |
| 3429                                         | Normocapnia and normal pH                            | 1                             |         |
| 339                                          | Compensated hypercapnia vs Normocapnia and normal pH | 0.79 (0.47-1.31)              |         |
| 2767                                         | Hypercapnic acidosis vs Normocapnia and normal pH    | 1.25 (1.04-1.51)              |         |
| <b>Traumatic Brain Injury- Operative</b>     |                                                      |                               |         |
|                                              | Hypercapnic group                                    |                               | 0.15    |
| 1473                                         | Normocapnia and normal pH                            | 1                             |         |
| 143                                          | Compensated hypercapnia vs Normocapnia and normal pH | 0.68 (0.34-1.34)              |         |
| 1356                                         | Hypercapnic acidosis vs Normocapnia and normal pH    | 1.18 (0.93-1.5)               |         |

\*No patient in cardiac surgery diagnostic category had neurosurgical intervention.

\*\* p-value for interaction between diagnostic subgroup and hypercapnic group- Stroke:0.24, Traumatic brain injury:0.81

\*\*\* all analyses are adjusted for GCS, patient severity (ANZROD with oxygen, pH and GCS components removed), propensity to present with hypercapnic acidosis, propensity to present with compensated hypercapnia and year of admission
